# Supplementary material for: Ratiometric colorimetric detection of nitrite using CoMnO3 nanofibers as an oxidase-like enzyme to induce diazotization reaction
Source: Royal Society of Chemistry journal article supplement (doi:10.1039/d3ay01290e), 2023-01-01
Supplement: d3ay01290e1.pdf [file d3ay01290e1.pdf]

# Supporting Information

*for*

## **Ratiometric colorimetric detection of nitrite using CoMnO<sub>3</sub> nanofibers as oxidase-like enzyme to induce diazotization reaction**

*Zoujun Peng<sup>1,2,#</sup>, Ziwen Liao<sup>1,3,#</sup>, Sipei Liu<sup>1,2</sup>, Tao Lian<sup>1</sup>, Peng Xu<sup>4,\*</sup>, Ping Qiu<sup>1,5,\*</sup>*

<sup>1</sup> *Department of Chemistry, Nanchang University, Nanchang 330031, China*

<sup>2</sup> *Institute for Advanced Study, Nanchang University, Nanchang 330031, China*

<sup>3</sup> *College of Food Science and Technology, Nanchang University, Nanchang 330031, China*

<sup>4</sup> *Center of Analysis and Testing, Nanchang University, Nanchang 330031, China*

<sup>5</sup> *Jiangxi Province Key Laboratory of Modern Analytical Science, Nanchang University, Nanchang 330031, China*

# These authors contributed equally.

\* Corresponding author.

*Email address: [pingqiu@ncu.edu.cn](mailto:pingqiu@ncu.edu.cn) (Ping Qiu), [pxu@ncu.edu.cn](mailto:pxu@ncu.edu.cn) (Peng Xu).*

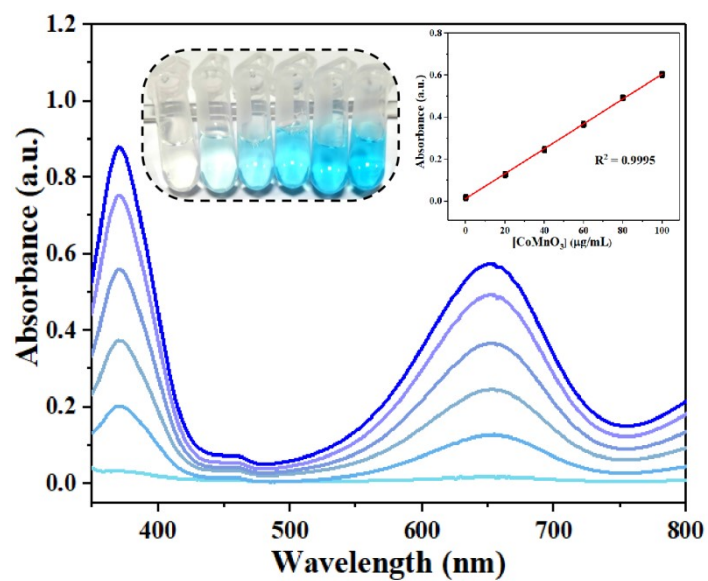

**Fig. S1** UV-vis absorption spectra of TMB catalyzed by various concentrations of CMO (the inset show the visually recognizable color changes of the reaction system and the absorbance values of TMB at 652 nm catalyzed by different concentrations of CMO).

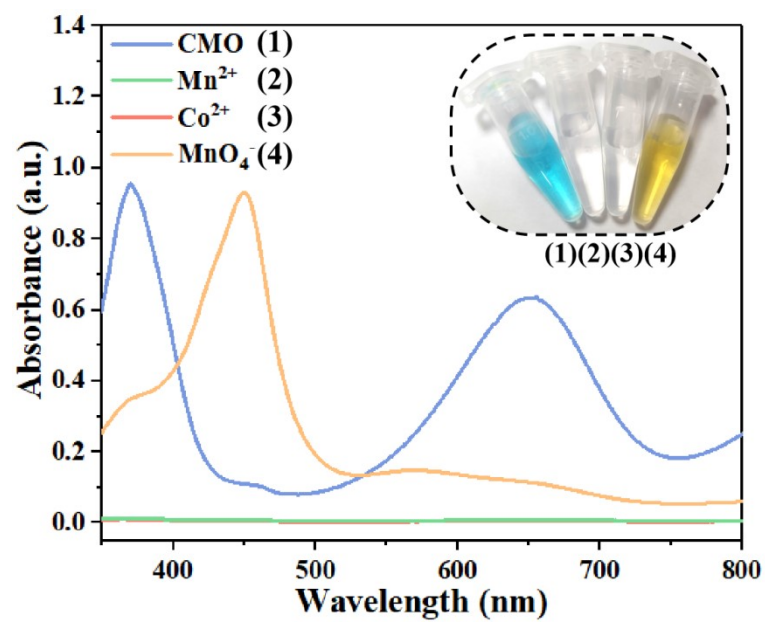

**Fig. S2** UV-vis absorption spectra of TMB catalyzed by various substrates (the inset show the visually recognizable color changes of the reaction system).

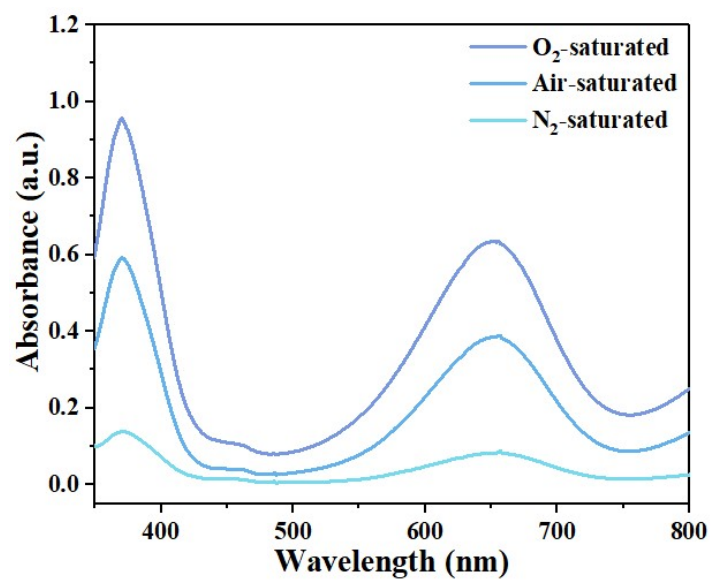

**Fig. S3** In the different reaction system's external environment, UV-vis absorption spectra of TMB catalyzed by CMO.

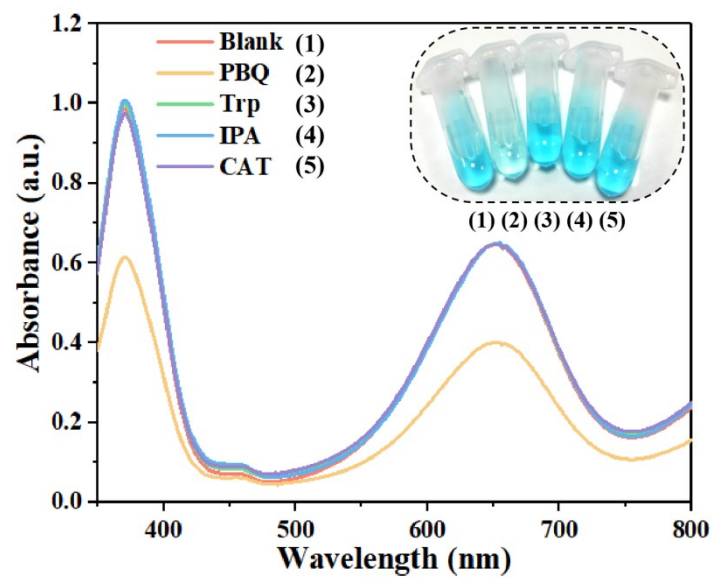

**Fig. S4** UV-vis absorption spectra of TMB catalyzed by CMO after treatment with different free radical scavenger (the inset show the visually recognizable color changes of the reaction system).

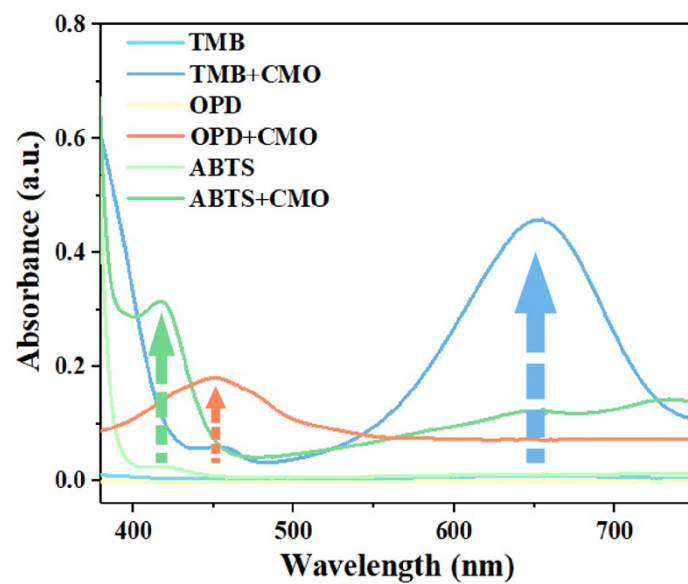

**Fig. S5** UV-vis absorption spectra of TMB, OPD, and ABTS catalyzed by CMO.

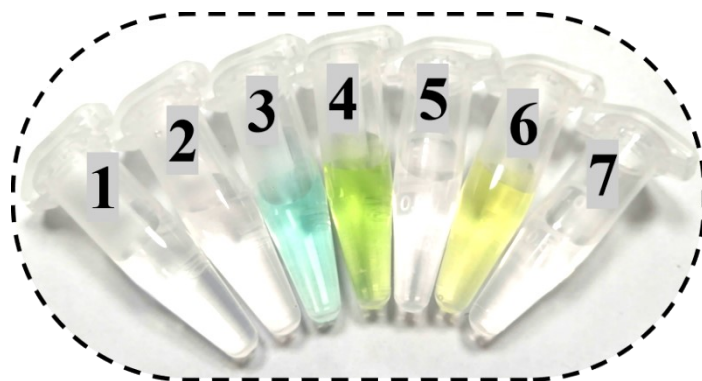

**Fig. S6** The digital image of different reaction systems: 1. TMB; 2. CMO; 3. TMB + CMO; 4. TMB + CMO +  $\text{NO}_2^-$ ; 5. TMB + CMO +  $\text{NO}_2^-$  + AA; 6. TMB +  $\text{NO}_2^-$ ; 7. TMB +  $\text{NO}_2^-$  + AA.

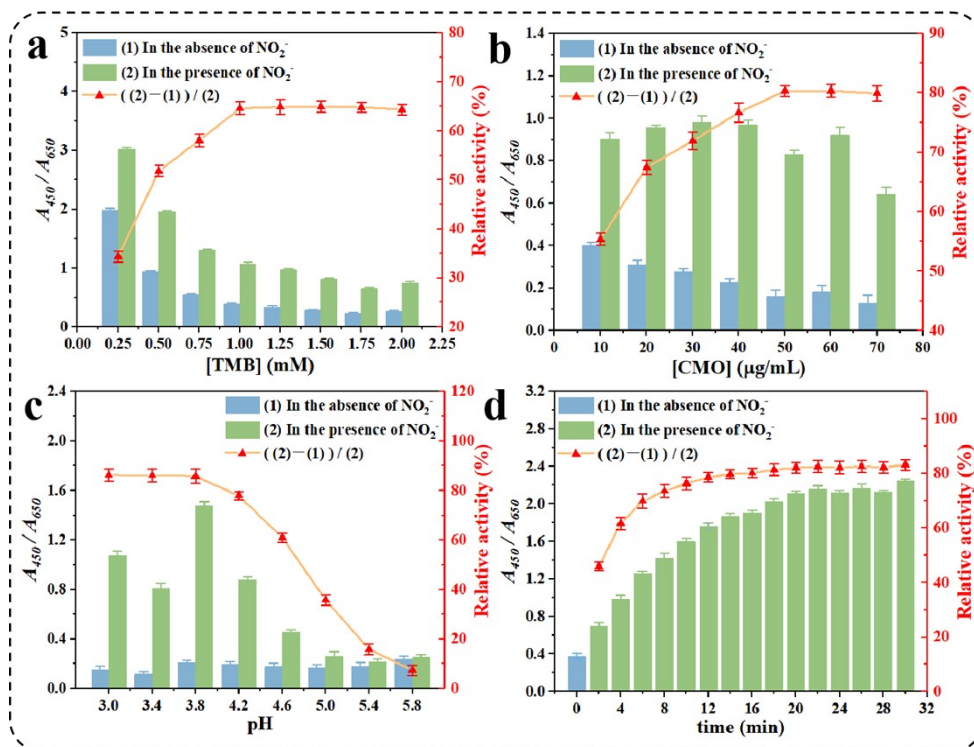

**Fig. S7** The factors of the concentration of TMB (a) and CMO (b), pH (c), and the second step reaction time (d) affecting value  $(A-A_0)/A$ .



---

**Table S1.** The  $K_m$  and  $V_{max}$  values of the CoMnO<sub>3</sub> NFs and other oxidase-like catalysts for the substrate of TMB.

| Materials                      | Morphology   | $K_m$ (mM) | $V_{max}$ ( $10^{-8}$ M S <sup>-1</sup> ) | Ref.      |
|--------------------------------|--------------|------------|-------------------------------------------|-----------|
| HRP                            | -            | 0.434      | 10                                        | [1]       |
| Fe <sub>3</sub> O <sub>4</sub> | nanoparticle | 0.098      | 3.44                                      | [1]       |
| MnO <sub>2</sub>               | nanosheet    | 0.095      | 26                                        | [2]       |
| Mn <sub>2</sub> O <sub>3</sub> | nanoparticle | 0.13       | 15                                        | [3]       |
| Mn <sub>3</sub> O <sub>4</sub> | nanoparticle | 5.1        | 92                                        | [4]       |
| CoOOH                          | nanoflake    | 0.98       | 5.79                                      | [5]       |
| Co(OH) <sub>2</sub>            | nanocage     | 0.362      | 6.06                                      | [6]       |
| Co <sub>3</sub> O <sub>4</sub> | nanoparticle | 0.063      | 1.88                                      | [7]       |
| CoMnO <sub>3</sub>             | nanofiber    | 0.105      | 63.7                                      | This work |

---

---

## References

- [1] L. Gao, J. Zhuang, L. Nie, J. Zhang, Y. Zhang, N. Gu, T. Wang, J. Feng, D. Yang, S. Perrett and X. Yan, *Nat. Nanotechnol.*, 2007, **2**, 577-583.
- [2] J. Liu, L. Meng, Z. Fei, P. J. Dyson and L. Zhang, *Biosens. Bioelectron.*, 2018, **121**, 159-165.
- [3] Z. J. Chen, Z. Huang, Y. M. Sun, Z. L. Xu and J. Liu, *Chem.-Eur. J.*, 2021, **27**, 9597-9604.
- [4] Y. Chen, Y. Xia, Y. Liu, Y. Tang, F. Zhao and B. Zeng, *Biosens. Bioelectron.*, 2022, **216**, 114650.
- [5] R. Jin, Z. Xing, D. Kong, X. Yan, F. Liu, Y. Gao, P. Sun, X. Liang and G. Lu, *J. Mater. Chem. B*, 2019, **7**, 1230-1237.
- [6] H. Zhu, Z. Quan, H. Hou, Y. Cai, W. Liu and Y. Liu, *Anal. Chim. Acta*, 2020, **1132**, 101-109.
- [7] H. Jia, D. Yang, X. Han, J. Cai, H. Liu and W. He, *Nanoscale*, 2016, **8**, 5938-5945.
